# Supplementary material for: Cell kinetics during regeneration in the sponge Halisarca caerulea: how local is the response to tissue damage?
Source: PeerJ. 2015 Mar 10;3:e820. doi: 10.7717/peerj.820 (PMC4358696; doi:10.7717/peerj.820)
Supplement: Supplemental Information 1 [file peerj-03-820-s001.xlsx]

## Sheet: Sheet1
state	sponge	time BrdU	% BrdU-positive choanocytes
regenerative	1	0.5	1.87
regenerative	2	0.5	1.91
regenerative	3	0.5	1.39
regenerative	4	1.5	3.32
regenerative	5	1.5	3.1
regenerative	6	1.5	2.87
regenerative	7	2	2.91
regenerative	8	2	3.04
regenerative	9	2	4.73
regenerative	10	6	7.12
regenerative	11	6	7.21
regenerative	12	6	6.61
regenerative	13	8	6.77
regenerative	14	8	7.92
regenerative	15	8	7.11
steady-state (De Goeij et al. 2009)	16	0.5	8.55987
steady-state (De Goeij et al. 2009)	17	0.5	7.26649
steady-state (De Goeij et al. 2009)	18	0.5	8.00725
steady-state (De Goeij et al. 2009)	19	1	12.23
steady-state (De Goeij et al. 2009)	20	1	10.7591
steady-state (De Goeij et al. 2009)	21	1	12.3101
steady-state (De Goeij et al. 2009)	22	3	27.1533
steady-state (De Goeij et al. 2009)	23	3	29.0817
steady-state (De Goeij et al. 2009)	24	3	26.8241
steady-state (De Goeij et al. 2009)	25	6	44.5181
steady-state (De Goeij et al. 2009)	26	6	44.7633
steady-state (De Goeij et al. 2009)	27	6	47.3521
steady-state (De Goeij et al. 2009)	28	10	49.6108
steady-state (De Goeij et al. 2009)	29	10	47.7534
steady-state (De Goeij et al. 2009)	30	10	49.5484
